# Supplementary material for: Facile synthesis of halogenated multi-walled carbon nanotubes and their unusual photoluminescence
Source: Royal Society of Chemistry journal article supplement (doi:10.1039/c2jm34275h), 2012-01-01
Supplement: c2jm34275h.pdf [file c2jm34275h.pdf]

## Supporting Information

### Facile Synthesis of Halogenated of Multi-Walled Carbon Nanotubes and Their Unusual Photoluminescence

*Zhaosheng Qian,\* Juanjuan Ma, Jin Zhou, Pei Lin, Congcong Chen, Jianrong Chen, and Hui Feng\**

College of Chemistry and Life Science, Zhejiang Normal University, Jinhua 321004, P. R. China

- 1. Figure S1.** The C 1s XPS high-resolution spectra of pristine MWCNTs, Cl-MWCNTs, Br-MWCNTs and I-MWCNTs
- 2. Figure S2.** The selected region of Br 3p XPS spectrum of Br-MWCNTs.
- 3. Figure S3.** The excitation spectra of Cl-MWCNTs-7d, Br-MWCNTs-7d and I-MWCNTs-7d
- 4. Figure S4.** The structures of model compounds with different aromatic rings ( $N = 1 - 10, 19$  and  $37$ ) optimized at PBE0/6-31G(d) level
- 5. Table S1.** The calculated excitation maximum wavelengths, oscillator strengths, electron transitions and emission maximum wavelengths of model compounds with 1-10, 19 and 37 aromatic rings

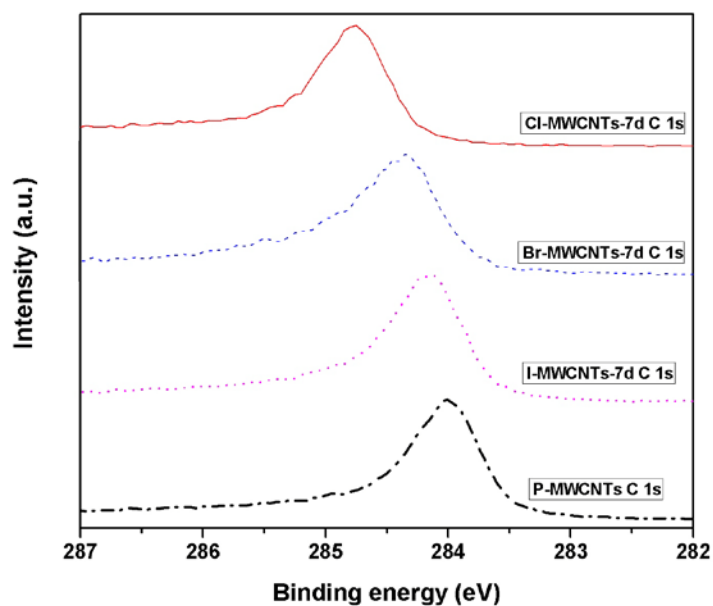

**Figure S1.** The C 1s XPS high-resolution spectra of pristine MWCNTs, Cl-MWCNTs, Br-MWCNTs and I-MWCNTs.

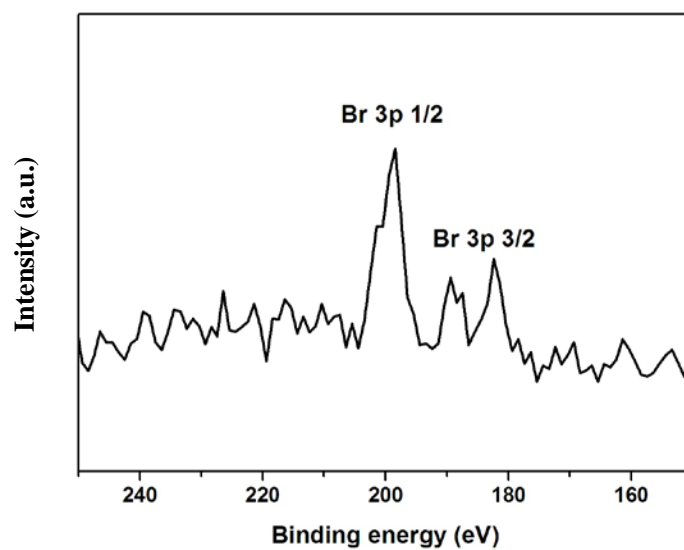

**Figure S2.** The selected region of Br 3p XPS spectrum of Br-MWCNTs.

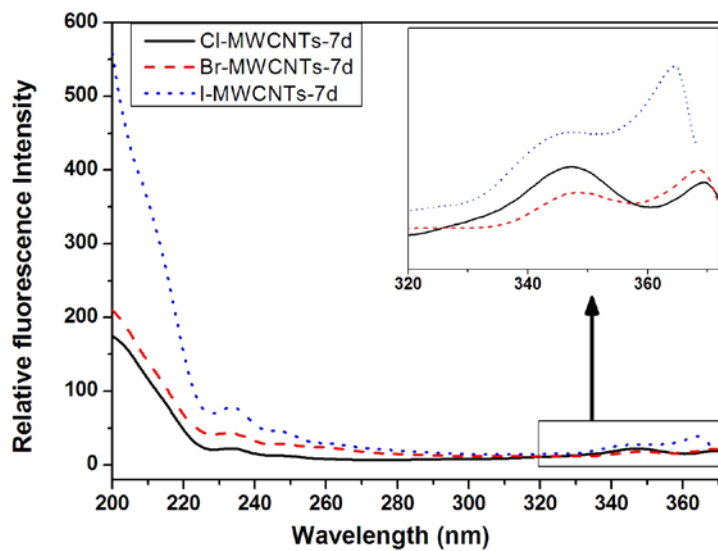

**Figure S3.** The excitation spectra of Cl-MWCNTs-7d, Br-MWCNTs-7d and I-MWCNTs-7d.

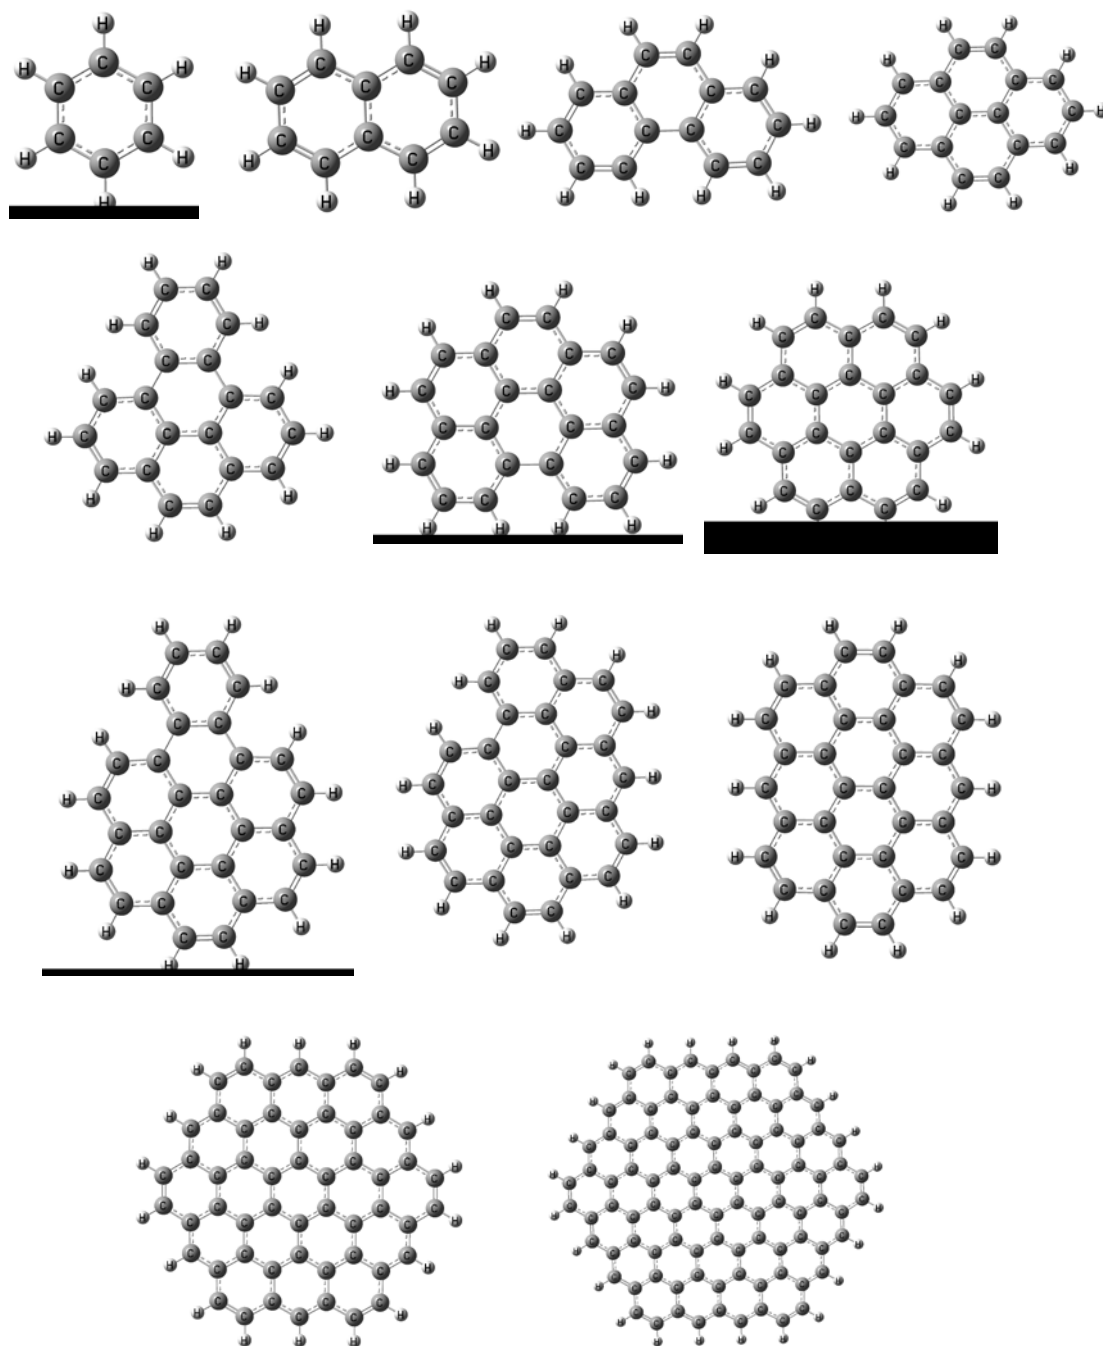

**Figure S4.** The structures of model compounds with different aromatic rings ( $N = 1 - 10, 19, 37$ ) optimized at PBE0/6-31G(d) level

**Table S1.** The calculated excitation maximum wavelengths, oscillator strengths, electron transitions and emission maximum wavelengths of model compounds with 1-10, 19 and 37 aromatic rings.

| N  | $\lambda_{\text{ex}}$ | $f_{\text{ex}}$ | contributions to excitation maximum wavelength |          | $\lambda_{\text{em}}$ |
|----|-----------------------|-----------------|------------------------------------------------|----------|-----------------------|
| 1  | 219                   | 0.00            | HOMO-1 -> LUMO                                 | -0.46170 | 230                   |
|    |                       |                 | HOMO-1 -> LUMO+1                               | 0.19139  |                       |
|    |                       |                 | HOMO -> LUMO                                   | 0.19152  |                       |
|    |                       |                 | HOMO -> LUMO+2                                 | 0.46175  |                       |
| 2  | 271                   | 0.0648          | HOMO-1 -> LUMO+1                               | 0.15780  | 310                   |
|    |                       |                 | HOMO -> LUMO                                   | 0.68621  |                       |
| 3  | 299                   | 0.0011          | HOMO-1 -> LUMO                                 | 0.45298  | 319                   |
|    |                       |                 | HOMO -> LUMO+1                                 | 0.53694  |                       |
| 4  | 324                   | 0.2751          | HOMO-1 -> LUMO+1                               | -0.21555 | 350                   |
|    |                       |                 | HOMO -> LUMO                                   | 0.67262  |                       |
| 5  | 327                   | 0.0001          | HOMO-1 -> LUMO                                 | -0.48188 | 347                   |
|    |                       |                 | HOMO -> LUMO+1                                 | 0.49889  |                       |
|    |                       |                 | HOMO -> LUMO+2                                 | -0.10354 |                       |
| 6  | 366                   | 0.2288          | HOMO-1 -> LUMO+1                               | -0.14938 | 407                   |
|    |                       |                 | HOMO -> LUMO                                   | 0.68665  |                       |
| 7  | 372                   | 0.0000          | HOMO-1 -> LUMO                                 | 0.49816  | 387                   |
|    |                       |                 | HOMO -> LUMO+1                                 | 0.49825  |                       |
| 8  | 379                   | 0.0000          | HOMO-1 -> LUMO                                 | -0.49605 | 397                   |
|    |                       |                 | HOMO -> LUMO+1                                 | 0.49805  |                       |
| 9  | 405                   | 0.0467          | HOMO-1 -> LUMO                                 | 0.43160  | 436                   |
|    |                       |                 | HOMO-1 -> LUMO+1                               | -0.11342 |                       |
|    |                       |                 | HOMO -> LUMO                                   | 0.36259  |                       |
|    |                       |                 | HOMO -> LUMO+1                                 | 0.40323  |                       |
| 10 | 440                   | 0.1757          | HOMO-1 ->LUMO+1                                | -0.16985 | 477                   |
|    |                       |                 | HOMO ->LUMO                                    | 0.68367  |                       |
| 19 | 532                   | 0.0000          | HOMO-1 -> LUMO                                 | 0.49694  | 551                   |
|    |                       |                 | HOMO-> LUMO+1                                  | 0.49699  |                       |
| 37 | 708                   | 0.0000          | HOMO-1 -> LUMO                                 | 0.49704  | 734                   |
|    |                       |                 | HOMO -> LUMO+1                                 | 0.49699  |                       |
